1 **Full title: Collective singing dynamics in a competition context drive song plasticity**

2

3 **Short title: Collective singing dynamics drive song plasticity**

4

5

6 Pepe Alcami<sup>1,2\*</sup>, Shouwen Ma<sup>1</sup>, Manfred Gahr<sup>1</sup>

7

8

9 <sup>1</sup> Department of Behavioural Neurobiology, Max Planck Institute for Ornithology, Seewiesen,  
10 Germany.

11 <sup>2</sup> Division of Neurobiology, Department Biology II, Ludwig-Maximilians-University, Munich,  
12 Germany.

13 \* Corresponding author: Pepe Alcami, [jalcami@orn.mpg.de](mailto:jalcami@orn.mpg.de)

14

15 **Author contributions:**

16 PA designed research, performed experiments, analyzed data, drafted, edited the manuscript.

17 SM performed experiments, analyzed data, edited the manuscript.

18 MG contributed to project conceptualization, edited the manuscript.

## 19 **Abstract**

20 Animals need to adapt their motor production to challenging social conditions at behaviorally-  
 21 relevant time scales. Here, we use telemetric recording technology from freely-behaving canaries in  
 22 natural-like social conditions in which male canaries compete for females. We report that male  
 23 canaries influence each other's singing during 'duels' characterized by temporal overlaps of their  
 24 songs, which are often followed by physical aggression. Duels evolve in time and both canaries can  
 25 lead or follow the other canary's song on a song-to-song basis. Remarkably, overlapping behavior  
 26 induces singing plasticity: both song length and its variability increase when canaries overlap their  
 27 songs. Furthermore, song acoustic properties reveal a link between dueling and song similarity.  
 28 Altogether, results show that canary singing behavior is plastic in social environments.

29

30

31

## 32 **Keywords**

33 birdsong, songbird, social interactions, canary, competition, behavioral coupling, behavioral  
 34 plasticity.

## Introduction

During the last decades, the link between neural networks and behavior has been extensively studied in simplified laboratory settings, departing from the complex natural environments in which animals and their brains have evolved (1). A key component of natural environments is the social context in which individual behavior takes place. The social context has been shown to influence the production and fine-tuning of learnt motor skills (2-5). The interaction of animals through vocal communication, a complex motor skill, embeds them in social networks that are critical to understand individual vocal behavior (6). Singing by songbirds is one such motor skill influenced by con-specifics in both developing and adult animals (7, 8). In songbird species where only males sing, not only do females listening to singing males influence their singing directly or indirectly (8, 9). Singing males do also influence each other (10, 11). In fact, singing by songbirds is involved in a plethora of functions, including mate attraction, pair bond formation, parental investment, territorial behavior and signaling of social hierarchy (6, 12-16). A number of these functions directly or indirectly involves signaling between males. Although the social context may affect song properties, whether songs change during natural counter-singing interactions of songbirds in social environments remains elusive.

Songs are fine tuned throughout learning until they become stable or ‘crystallized’. In ‘close-ended’ songbirds like zebra finches (*Taeniopygia guttata*), songs crystallize during development. In contrast in seasonal songbirds like canaries (*Serinus canaria*), the song circuits become plastic yearly, and songs crystallize before each breeding season. As a result, songs strongly differ across seasons (17, 18). Once song is crystallized, singing typically occurs with increased stereotypy in terms of temporal, spectral, grammatical structure and length (19, 20). Whereas most studies have focused on the zebra finch model, whose songs are highly stereotypical in adults, canary songs are, on the contrary, complex and variable in their acoustic properties, length and grammar (20, 21), even when stereotypy is increased during the breeding, crystallized season. Canary songs therefore constitute an excellent model to study the impact of social contexts on the plasticity of ‘crystallized’ songs (20).

The ecological, behavioral and evolutionary frameworks in which singing interactions occur in songbirds have been extensively characterized (6), making of songbirds an excellent model to study behaviors relevant for the ecology and evolution of species. Singing interactions have been described in a number of species, where the relative timing and acoustic properties of male songs relative to each other can encode aggressive information (22-25). Most studies have however used song playbacks, that is, songs played on a loudspeaker and not in contexts in which birds vocally interact. Whereas existing studies have allowed deepening our understanding on how playbacks

alone are able to evoke behavioral responses, they lack the interactive component between singing birds. The study of directly-interacting birds has been hurdled by the necessity to disambiguate signals from individual birds, particularly when birds overlap their songs. A first attempt to overcome this difficulty consists in the use of microphone arrays (22). However, they lack the temporal and acoustic precision to characterize in greater detail singing interactions due to their distance to sound sources. An alternative solution to record individual vocalizations that lacks these caveats is the use of individual microphones mounted on each animal (26). This technique, that we opted for here, allows the precise monitoring of individual songs.

In canaries, song playbacks have revealed that female canaries prefer overlapping to overlapped playbacks (27). Overlapping another canary's song may be interpreted as a signal of dominance (27, 28). Furthermore, female canaries allocate greater yolk amounts in their eggs in response to overlapping songs, highlighting the importance of overlapping behavior for biological fitness (16). Because of all these reasons, canaries are a model species for which the behavioural and ecological implications of singing overlaps are best studied. However, whether countersinging occurs in social groups of canaries, what are the relative dynamics of singing and how they impact songs has not been studied due to the technical difficulty to record individual songs in a group. Here, we combine recordings in the field and in the laboratory. In the laboratory, we use microphones mounted on individual canaries. These allow us to record their songs with telemetry with high temporal precision (26) in mixed aviaries and characterize the relative singing dynamics of males and their impact on song properties.

## Results

### *Multiple-microphone recordings in the field reveal temporally-overlapping songs*

We first asked whether canaries overlap their songs in their natural environment. For that purpose, we recorded wild canaries during the breeding season in Pico island (Azores, Portugal). Recordings were simultaneously performed with two directional microphones oriented towards different directions in fields where canaries had been located. Song spectrograms revealed canary song temporal overlaps, as shown by songs from different canaries preferentially recorded in one microphone (Fig. 1).

In the same fields where canaries could be recorded, the vocal production from a number of other bird species was also recorded, resulting in a complex and 'noisy' recording of canary songs. Additional frequently recorded species included chaffinches (*Fringilla coelebs ssp. moreletti*), blackbirds (*Turdus merula ssp. azorensis*), green finches (*Carduelis chloris*), blackcaps (*Sylvia atricapilla*) and robins (*Erithacus rubecula*). The vocal production of other bird species also

happened to overlap canary songs, as can be appreciated in the syllables labeled with a star in Fig. 1, which correspond to non-canary calls and songs.

In order to further characterize the intraspecific singing dynamics of populations of male canaries with improved temporal detail and in better-controlled social environments that exclude inter-specific interactions, we designed a reduced social setting in an aviary kept in breeding conditions with three males and two females, reproducing sex ratios previously reported in the wild (29). That is, we reproduced a competition context in which males compete for females during the breeding season.

### ***Telemetric recordings in natural-like social environments***

We mounted custom-made ‘backpack microphones’ (26) on the back of freely-moving male canaries. This allowed us to record the individual vocal production simultaneously from all males with the help of a telemetric recording system (Fig. 2A,B). Our results show that male canaries influence each other’s singing and tend to overlap their songs when they spontaneously interact with each other. Fig. 2C (left) illustrates the songs from a canary aligned to the song onset for all songs of another canary in the same aviary during one day. Fig. 2C (right) shows the corresponding histogram of the times at which songs were recorded centered at song onset from the reference canary. Inspection of the distribution of songs aligned to the onset of the reference canary songs revealed a bimodal distribution. The distribution at negative values in Fig. 2C corresponds to songs in which singing started before the reference canary started singing, whereas the distribution at positive values corresponds to songs occurring after the other canary started singing. In five out of six groups recorded, and in 2 to 3 birds per group, the histogram of the times at which songs were recorded from one bird centered at song onset from another bird showed an increased singing activity relative to the histogram generated by shuffling randomly the onset of songs during the recording period (dashed lines in Fig. 2D). The sixth group (‘Group 1’, not shown) was excluded from analysis due to the low number of songs that did not allow us to perform statistical analysis on singing interactions.

To quantify whether canaries increase their overall singing activity when they overlap their songs, we examined the relationship between the fraction of daily overlaps and the number of songs sung each day by all recorded birds. The fraction of song overlaps and the number of songs were positively correlated (two-tail linear correlation test,  $P = 0.002$ ,  $r = 0.27$ ), suggesting that canaries that show overlapping behavior sing more frequently.

Finally, in order to confirm the aggressive signaling nature of canaries singing together, we quantified the relationship between singing and physical fights. Singing temporal overlaps were

137 followed by fights in  $51.4 \pm 0.1$  % of the cases, whereas individual singing evoked fights in only  
 138  $13.1 \pm 0.1$  % of the cases (average from video recordings in  $n = 3$  groups,  $P < 0.05$  for each group,  
 139 Fisher exact test). Thus, song overlapping interactions are aggressive signals predictive of physical  
 140 fights. We will henceforth call ‘duels’ the interactions in which canaries influence each other’s  
 141 singing, establishing pairwise singing contests.

142 To summarize, a social competition context induces song overlapping between male  
 143 canaries, influencing both the singing activity and the relative timing of singing. Moreover, duels  
 144 are predictive of aggressive interactions.

145

# 146 *Leader and follower dynamics*

147 We observed in the five groups overlapping behavior from two male canaries, and occasionally  
 148 from a third canary. The third canary adopted otherwise a predominant soloist strategy, potentially  
 149 eventually joining the group. Songs were recorded continuously for days, revealing overlapping  
 150 behaviors in which both singers could lead or follow on a song-to-song basis. Remarkably, singing  
 151 dynamics were plastic on a temporal scale of days, as can be appreciated in the three examples  
 152 depicted in Fig. 3A-C.

153 The histogram of the times at which songs were recorded centered at song onset from the  
 154 reference canary are shown in Fig. 3 for several canaries in each group during several days. The two  
 155 birds from group 3 (Fig. 3A1, B1) start in a configuration in which bird 0 leads the singing duel and  
 156 bird 2 follows. On the following days, leader/follower roles reconfigure: whereas bird 2 is only  
 157 acting as a follower during the first days, singing dynamics evolve to mixed leader/follower  
 158 dynamics in which the two canaries both lead and follow. In group 5 (Fig. 3A2, B2) during the first  
 159 days, singing activity of bird 5 shows a single mode of singing activity at short latencies (0.2 to 0.8  
 160 s.) relative to the reference bird 4 singing onset, mostly corresponding to a leader behavior: most  
 161 songs start at negative time values before song onset of bird 4 and stop at positive values, after song  
 162 onset of bird 4. With time, the distribution becomes wider and bimodal. The temporal dynamics of  
 163 group 6 (Fig. 3A3, B3) show plasticity in the timing of singing activity from bird 4 relative to bird  
 164 2: singing from bird 4 shifts from loosely following bird 2 (peak singing at 7.6 s-delay from song  
 165 onset in bird 4) on day 1 to a tight, 0.0 s-latency between the peak of singing activity of bird 4  
 166 relative to the song onset of bird 2 on day 8. Interestingly, shortening of this latency occurred when  
 167 the third male in the group, bird 5, also started to vocally interact with the two birds that initially  
 168 overlapped their songs. Remarkably, bird 5 behaves as a leader, reconfiguring the relative singing  
 169 dynamics in the whole group.

170 In summary, the relative timing of overlapping singing interactions in a group evolves on a

171 time scale of days.

172

### 173 ***Leader's, follower's and soloist's songs differ in length***

174 We next examined the influence of the social singing context on a song-to-song basis. We quantified  
175 song length in different overlapping conditions. Songs produced by the two canaries mediating most  
176 singing interactions in each group had a significantly longer duration during overlapping  
177 interactions than when the same birds sang solo songs ( $5.66 \pm 0.07$  s. vs  $4.86 \pm 0.05$  s.,  $P \ll 0.001$ ,  
178 mixed model,  $n = 3661$  solo songs,  $n = 2501$  temporally-overlapping songs from  $n = 10$  canaries).

179 Interestingly, song length differed depending on the relative timing of singing interactions:  
180 leader songs were on average longer than solo songs, systematically for all birds. In contrast,  
181 follower songs were significantly longer than solo songs in only three out of ten birds (Fig. 4A),  
182 revealing a common strategy to sing longer-lasting songs when canaries lead singing interactions,  
183 compared to a strategy only taken by some of them to also sing longer songs when they behave as  
184 followers. Overall, across birds, leading songs were 51.0 % longer than solo songs ( $7.46 \pm 0.54$  s vs.  
185  $4.95 \pm 0.41$  s,  $P = 0.002$ , two-tail Wilcoxon Signed-Rank test,  $n = 10$  canaries, Fig. 4B1) and 33.5 %  
186 longer than following songs ( $5.59 \pm 0.51$  s,  $P = 0.002$ , two-tail Wilcoxon Signed-Rank test,  $n = 10$   
187 canaries, Fig. 4B1). Solo songs were not significantly shorter than follower's songs, comparing  
188 mean lengths for all birds ( $P = 0.12$ , two-tail Wilcoxon Signed-Rank test,  $n = 10$  canaries, Fig.  
189 4B1).

190 We further examined whether the variability of song length was changing during singing  
191 interactions (Fig. 4 B2). Remarkably, the standard deviation of song length also significantly  
192 increased by ~27 % for leading songs relative to solo songs ( $3.6 \pm 0.5$  s vs.  $2.8 \pm 0.2$  s respectively,  
193  $P = 0.004$ , two-tail Wilcoxon Signed-Rank test,  $n = 10$  canaries), but was not significantly different  
194 for follower songs ( $3.2 \pm 0.3$  s,  $P = 0.12$ , two-tail Wilcoxon Signed-Rank test,  $n = 10$  canaries).  
195 Thus, canaries sing songs that are more variable in length when they lead singing duels.

196 In summary, song length and its variability depend on the relative timing in the singing  
197 interactions within a duel.

198

### 199 ***Dueling canaries sing similar songs***

200 In order to further investigate the link between songs and singing overlapping behavior, we  
201 finally asked whether canaries that tend to duel in each group share specific song properties relative  
202 to the 'soloist' canary in the group. We performed principal component analysis (PCA) from the  
203 songs of all canaries in the four groups in which we had enough songs from all the canaries to  
204 perform this analysis. Performing principal components analysis (PCA) on song features shows a



separation between the dueling canaries and the soloist canary (Fig. 5).

A representative example of songs in a group is shown in Fig. 5A. The corresponding representation in the three main projection vectors is shown in Fig. 5B, where the song of the three canaries in the group is represented by different colors. It can be appreciated in Fig. 5B that the clouds representing the three first components from the two overlapping canaries are closer to each other than to the soloist. We quantified the average distance between points in this 3D projection for all four groups, finding a significantly smaller distance between song acoustic properties of dueling canaries than between dueling canaries and the predominantly-soloist canary (Fig. 5C) ( $0.50 \pm 0.04$  vs.  $0.61 \pm 0.07$ ,  $P = 0.008$ , Wilcoxon Signed-Rank Test,  $n = 8$  paired comparisons, 12 birds). Since the songs for this analysis were solo songs, results suggest that the singing repertoire used by dueling canaries is closer to each other than it is to the soloist's, independently of the singing interaction.

## Discussion.

### *Socially-induced plasticity of crystallized songs*

The first major conclusion of our study is that interactive singing dynamics influence both singing activity and song properties of male canaries. Our results show that the decision of male canaries to sing depends on the decision to sing by other males embedded in a social competition network. Remarkably, song interactions evoke singing plasticity: song length and its variability differ depending on the singing onset relative to the other canary (Fig. 4). This study adds to previous evidence that crystallized songs are plastic (30).

Here, we have shown that direct interactions between male canaries through singing induce singing plasticity and they are a good predictor of physical aggression. This type of influence on songs from other males adds therefore to the classically-studied direct influence by females on male song ('directed' songs). Birdsong should therefore be studied in mixed groups of birds containing males and females. Songs from male songbirds in isolated contexts, or from a male housed with a female, as is often done, may bias the type of songs recorded for a specific function, whereas songs in natural contexts involve multiple signaling modes, and complex eavesdropping interplays (6, 11, 12, 24, 31). Singing interactions and their impact on songs should in the future be addressed in the field, where functions of songs are likely more diverse than in laboratory settings. Altogether, our results confirm the importance of studying song production and more broadly, behaviors that involve socially-influenced actions and decision making, in their social context.

### *Neurobiological implications*



239 Motor behaviors are acquired throughout plastic developmental periods during which pre-motor  
 240 programs are stored in the connectivity and properties of neural networks (32). This is the case of  
 241 rhythmically-activated neural networks or central pattern generators (CPGs), which retain  
 242 throughout adulthood the ability to be activated in specific cellular sequences while remaining  
 243 plastic (33), ensuring the temporal control of movements. Our results shed light into the socially-  
 244 induced plasticity of crystallized songs. Singing has been suggested to be controlled a CPG found in  
 245 song nucleus HVC (34). Whether song timing and duration is encoded in a CPG in HVC or as has  
 246 been more recently suggested, in a recurrent network across song nuclei in the songbird brain (35),  
 247 the behavioral plasticity of songs found here suggests that premotor networks may undergo a  
 248 reconfiguration of their activity in social contexts. Neural recordings from canaries in natural social  
 249 contexts should allow in the future studying the neural basis of how crystallized behaviors  
 250 reconfigure at fast behavioral time scales in response to challenging social environments. The  
 251 recording of brain nuclei and in particular of HVC during canary duels will be of great benefit to  
 252 understand whether and how birdsong premotor networks are reconfigured in social environments.

253 We find that the relative timing of singing influences song properties in a song-to-song basis,  
 254 suggesting that environmental cues feed into the motor commands controlling singing. This  
 255 feedback occurs as fast as ~ 100s of ms time at which the latency of maximal singing activity of one  
 256 canary aligns to the singing onset in a dueling canary (Fig. 3). Interestingly, it is known that there is  
 257 a powerful inhibitory gating of HVC auditory responses during singing (36, 37). However, our  
 258 results suggest that it may be suppressed in social contexts. It would be interesting to further  
 259 investigate whether inhibitory gating of auditory responses in HVC is released during singing duels.

260

### 261 ***Coordinated singing strategies: behavioral ecology and song evolution implications***

262 Our results show that there is a diversity of behavioral strategies in canaries that are already  
 263 apparent in small controlled groups of three males and two females: some canaries tend to perform  
 264 singing duels and aggressive displays, whereas other birds adopt predominantly soloist strategies.  
 265 Songs are therefore a complex signaling system with marked individual differences and strategies.  
 266 Remarkably, these strategies are highly plastic in animals with crystallized songs. This is  
 267 particularly relevant since leader/follower relationships control song properties (Fig. 4). The link of  
 268 singing strategies with biological fitness and with the evolution of birdsong cultures are additional  
 269 exciting future directions to pursue. Further studies should elucidate the specific links between  
 270 singing interactions in canaries, the underlying social structures and their evolution. Our  
 271 experiments have shown the emergence of leader/follower dynamics, reminiscent of direct  
 272 bidirectionally-coupled systems. (28). It is tempting to speculate that the preference of females for

273 overlapping songs in natural social competition contexts (28) may have shaped the abilities of male  
 274 canaries to sing long songs, and the neural circuit mechanisms allowing them to integrate social  
 275 contextual information, reshape activation patterns in the song system and sing longer-lasting songs.  
 276 Further analysis of songs should reveal additional traits that change during singing interactions and  
 277 what they signal. In terms of evolutionary ecology, how song and physical duels impact fitness is at  
 278 this stage unclear. Indeed, females prefer overlapping singers, but also non-fighting canaries (28).  
 279 However, in our conditions, singing duels were often accompanied by physical aggression. Future  
 280 experiments in the field should reveal whether physical aggression also occurs in natural conditions  
 281 between dueling birds, and the biological fitness associated to different singing strategies of leaders,  
 282 followers and soloists. How dominance expresses itself in a group in the singing dynamics  
 283 strategies also needs to be investigated.

284

## 285 *Acoustic properties of dueling birds: ecological and cultural implications*

286 Results in Fig. 5 suggest that singing similarity may predispose canaries with more similar  
 287 repertoires to perform singing duels. However, canaries may alternatively adapt very fast, with few  
 288 song exposures from the first canary singing, to the repertoire and properties of another canary,  
 289 thereby avoiding or forcing song feature matching and temporal overlaps. Only knowing the full  
 290 repertoire before the onset of singing interactions will allow disambiguating whether canaries use a  
 291 repertoire that predisposes to compete or they instead make an adaptative choice of song properties  
 292 among a library of available features in a social competition context. This raises the fascinating  
 293 question of how singing duels may have shaped the evolution of song culture, both regarding song  
 294 length and similarity of songs in a population, and whether the co-existence of both strategies, solo  
 295 singing and duels, combine complementary strategies which ensure a large song repertoire at the  
 296 population level.

297

## 298 **Materials and Methods**

### 299 *Ethics permits*

300 The use of audio transmitters, bird housing and all experimental procedures were approved by the  
 301 government of Upper Bavaria (Ethical approval ROB-55.2-1-54-2532. Vet\_02-17-211) and  
 302 performed according to the directives 2010/63/EU of the European parliament and of the council of  
 303 22 September 2010 on the protection of animals used for scientific purposes.

304

### 305 *Animals and housing conditions*

306 A total of 30 adults canaries (six groups formed by three males and two females each) were part of

this study. Animals were randomly selected from larger aviaries and housed together in 2m\*1m\*1m indoor aviaries or alternatively 1.68m\*0.78m\*1.68m boxes. In both cases, birds were not within hearing range of other birds. Birds were kept in breeding conditions under a 13/11 Light/Dark cycle (fluorescent lamps), at 24 °C and 60–70% humidity. Food (mixed seeds, and “egg food”), fresh water and cuttlebone were provided *ad libitum*, as well as nesting material and nests.

### ***Audio recordings on Pico Island***

Two Sennheiser MKH 70 P48 directional microphones pointed in different orientations in field where canaries had been observed. Recordings were performed with a Marrantz PMD661 recorder with an audio bit depth of 24 bit.s<sup>-1</sup>. The location of the recording areas (Fig. 1) in Arieiro and São João were 38°26'29.5"N28°28'40.6"W and 38°25'10.9"N28°20'05.0"W.

### ***Audio recordings at the Max Planck Institute for Ornithology***

The five birds for each group used for telemetric recordings were moved from larger aviaries to smaller indoor aviaries in our institute. Custom-made wireless microphones (0.6g, including battery) (26) were used for sound recording. The wireless microphone was placed on the back and fixed with an elastic band around the upper thighs of the bird. The frequency modulated radio signals were received with the communication receivers (AOR5000, AOR, Ltd., Japan). Audio signals were fed into an eight channel audio A/D converter (Fast Track Ultra 8R, Avid Technology, Inc. U.S.A.) and recorded with custom-made software.

### ***Video recordings***

Videos used for behavioural quantifications were recorded in aviaries with a CX405 handycamcorder (Sony).

### ***Song analysis***

Song onset and duration were manually determined on song sonograms. Analysis were performed with Matlab and Igor Pro Software. Songs recorded in the field were high-pass filtered for display using Audacity software, with a cutoff frequency of 2kHz and a roll-off of 12 dB per octave.

We used Sound Analysis Pro 2011 software (Version 2011.104) (38) for segmentations and analyses of vocal sounds to generate Fig. 5. The program segments the song in an automatic process and measures the sound features of each syllable including syllable duration, mean amplitude, mean pitch, mean frequency modulation, mean entropy, mean pitch goodness, mean average frequency. We measured the sound features of all retained songs for each bird. Then we used the generic

341 function “pca” in Matlab (Mathworks, U.S.) to calculate the principal components (PC1, PC2 and  
342 PC3) for each bird based on all the measurements.

343

344 *Statistical analysis*

345 Data along the manuscript are provided as mean  $\pm$  S.E.M. Statistics were performed with Igor Pro  
346 Software or Matlab. The specific tests used are specified along the manuscript.

## References

1. J. W. Krakauer, A. A. Ghazanfar, A. Gomez-Marin, M. A. MacIver, D. Poeppel, Neuroscience Needs Behavior: Correcting a Reductionist Bias. *Neuron* **93**, 480-490 (2017).
2. E. Svensson, B. C. Sheldon, The Social Context of Life History Evolution. *Oikos* **83**, 466-477 (1998).
3. N. Ota, M. Gahr, M. Soma, Couples showing off: Audience promotes both male and female multimodal courtship display in a songbird. *Science Advances* **4**, eaat4779 (2018).
4. S. L. King, L. S. Sayigh, R. S. Wells, W. Fellner, V. M. Janik, Vocal copying of individually distinctive signature whistles in bottlenose dolphins. *Proceedings of the Royal Society B: Biological Sciences* **280**, 20130053 (2013).
5. L. Lefebvre, L.-A. Giraldeau, in *Social learning in animals: The roots of culture*. (Academic Press, San Diego, CA, US, 1996), pp. 107-128.
6. P. K. McGregor, R. K. Butlin, T. Guilford, J. R. Krebs, Signalling in territorial systems: a context for individual identification, ranging and eavesdropping. *Philosophical Transactions of the Royal Society of London. Series B: Biological Sciences* **340**, 237-244 (1993).
7. O. Tchernichovski, T. Lints, P. P. Mitra, F. Nottebohm, Vocal imitation in zebra finches is inversely related to model abundance. *Proceedings of the National Academy of Sciences* **96**, 12901-12904 (1999).
8. A. P. King, M. J. West, Presence of female cowbirds (*Molothrus ater ater*) affects vocal imitation and improvisation in males. *Journal of Comparative Psychology* **103**, 39-44 (1989).
9. R. Sossinka, J. Böhner, Song Types in the Zebra Finch *Poephila guttata castanotis*1. *Zeitschrift für Tierpsychologie* **53**, 123-132 (1980).
10. R. B. Payne, The social context of song mimicry: Song-matching dialects in indigo buntings (*Passerina cyanea*). *Animal Behaviour* **31**, 788-805 (1983).
11. M. D. Beecher, S. E. Campbell, J. M. Burt, C. E. Hill, J. C. Nordby, Song-type matching between neighbouring song sparrows. *Animal Behaviour* **59**, 21-27 (2000).
12. Ç. I. Akçay, M. E. Tom, S. E. Campbell, M. D. Beecher, Song type matching is an honest early threat signal in a hierarchical animal communication system. *Proceedings of the Royal Society B: Biological Sciences* **280**, 20122517 (2013).
13. S. Collins, in *Nature's Music*, P. Marler, H. Slabbekoorn, Eds. (Academic Press, San Diego, 2004), pp. 39-79.
14. D. E. Kroodsma, Reproductive Development in a Female Songbird: Differential Stimulation by Quality of Male Song. *Science* **192**, 574-575 (1976).
15. M. S. Ficken, R. W. Ficken, S. R. Witkin, Vocal repertoire of the Black-capped Chickadee. *The Auk* **95**, 34-48 (1978).
16. V. Garcia-Fernandez, M. Amy, A. Lacroix, G. Malacarne, G. Leboucher, Eavesdropping on Male Singing Interactions Leads to Differential Allocation in Eggs. *Ethology* **116**, 662-670 (2010).
17. F. Nottebohm, M. E. Nottebohm, L. Crane, Developmental and seasonal changes in canary song and their relation to changes in the anatomy of song-control nuclei. *Behavioral and Neural Biology* **46**, 445-471 (1986).
18. S. Leitner, C. Voigt, L. M. Garcia-Segura, T. Hof, M. Gahr, Seasonal activation and inactivation of song motor memories in wild canaries is not reflected in neuroanatomical changes of forebrain song areas. *Horm Behav* **40**, (2001).
19. R. H. R. Hahnloser, A. A. Kozhevnikov, M. S. Fee, An ultra-sparse code underlies the generation of neural sequences in a songbird. *Nature* **419**, 65 (2002).
20. J. Allende, N. Giret, L. Pidoux, C. Del Negro, A. Leblois, Seasonal plasticity of song behavior relies on motor and syntactic variability induced by a basal ganglia-forebrain

- 397 circuit. *Neuroscience* **359**, 49-68 (2017).
- 398 21. J. E. Markowitz, E. Ivie, L. Kligler, T. J. Gardner, Long-range Order in Canary Song. *PLOS*  
399 *Computational Biology* **9**, e1003052 (2013).
- 400 22. M. Araya-Salas, K. Wojczulanis-Jakubas, E. M. Phillips, D. J. Mennill, T. F. Wright, To  
401 overlap or not to overlap: context-dependent coordinated singing in lekking long-billed  
402 hermits. *Animal Behaviour* **124**, 57-64 (2017).
- 403 23. M. Naguib, S. Kipper, Effects of different levels of song overlapping on singing behaviour  
404 in male territorial nightingales (*Luscinia megarhynchos*). *Behavioral Ecology and*  
405 *Sociobiology* **59**, 419-426 (2006).
- 406 24. T. Dabelsteen, P. K. McGregor, J. Holland, J. A. Tobias, S. B. Pedersen, The signal function  
407 of overlapping singing in male robins. *Animal Behaviour* **53**, 249-256 (1997).
- 408 25. D. J. Mennill, L. M. Ratcliffe, Overlapping and matching in the song contests of black-  
409 capped chickadees. *Animal Behaviour* **67**, 441-450 (2004).
- 410 26. L. F. Gill *et al.*, A minimum-impact, flexible tool to study vocal communication of small  
411 animals with precise individual-level resolution. *Methods in Ecology and Evolution* **7**, 1349-  
412 1358 (2016).
- 413 27. G. Leboucher, K. Pallot, Is he all he says he is? Intersexual eavesdropping in the domestic  
414 canary, *Serinus canaria*. *Animal Behaviour* **68**, 957-963 (2004).
- 415 28. M. Amy *et al.*, Female canary mate preferences: Differential use of information from two  
416 types of male-male interaction. *Animal Behaviour* **76**, 971-982 (2008).
- 417 29. C. Voigt, S. Leitner, Breeding biology of the island canary *Serinus canaria* (AVES:  
418 FRINGILLIDAE) on the Desertas island Ilhéu Chão. *Boletim do Museu Municipal do*  
419 *Funchal* **50**, (1998).
- 420 30. E. C. Tumer, M. S. Brainard, Performance variability enables adaptive plasticity of  
421 'crystallized' adult birdsong. *Nature* **450**, 1240-1244 (2007).
- 422 31. A. P. W. King, Meredith J., Presence of female cowbirds (*Molothrus ater ater*) affects vocal  
423 imitation and improvisation in males. *Journal of Comparative Psychology* **103**, 39-44  
424 (1989).
- 425 32. K. T. Sillar, D. Combes, S. Ramanathan, M. Molinari, J. Simmers, Neuromodulation and  
426 developmental plasticity in the locomotor system of anuran amphibians during  
427 metamorphosis. *Brain Research Reviews* **57**, 94-102 (2008).
- 428 33. E. Marder, T. O'Leary, S. Shruti, Neuromodulation of Circuits with Variable Parameters:  
429 Single Neurons and Small Circuits Reveal Principles of State-Dependent and Robust  
430 Neuromodulation. *Annual Review of Neuroscience* **37**, 329-346 (2014).
- 431 34. M. A. Long, M. S. Fee, Using temperature to analyse temporal dynamics in the songbird  
432 motor pathway. *Nature* **456**, 189 (2008).
- 433 35. K. Hamaguchi, M. Tanaka, R. Mooney, A Distributed Recurrent Network Contributes to  
434 Temporally Precise Vocalizations. *Neuron* **91**, 680-693 (2016).
- 435 36. J. S. McCasland, M. Konishi, Interaction between auditory and motor activities in an avian  
436 song control nucleus. *Proceedings of the National Academy of Sciences* **78**, 7815-7819  
437 (1981).
- 438 37. M. F. Schmidt, M. Konishi, Gating of auditory responses in the vocal control system of  
439 awake songbirds. *Nature Neuroscience* **1**, 513-518 (1998).
- 440 38. O. Tchernichovski, F. Nottebohm, C. E. Ho, B. Pesaran, P. P. Mitra, A procedure for an  
441 automated measurement of song similarity. *Animal Behaviour* **59**, 1167-1176 (2000).
- 442

443 **Acknowledgements**

444 PA was funded by the Munich Center for Neurosciences and the Max Planck Institute for  
 445 Ornithology. SM and MG were funded by the Max Planck Institute for Ornithology. We are  
 446 extremely grateful to Stefan Leitner, Lisa Trost, Roswitha Brighton and animal caretakers from our  
 447 Institute for their support throughout this study. We are thankful to Hannes Sagunsky and Markus  
 448 Abels for technical support, and to our neighbors in Pico island for their support while performing  
 449 recordings in Pico island fields. We are very grateful to Ahmed El Hady, Wolfgang Goymann,  
 450 Stefan Leitner and Frederic Theunissen for comments on previous versions of this manuscript.

451

452 **Competing interests**

453 The authors declare no competing interests.

454



# Figures

A

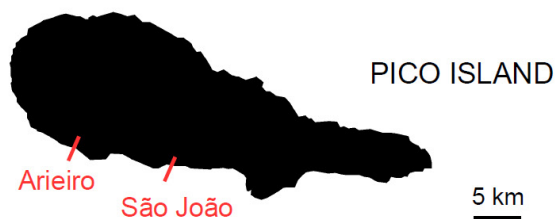

B Arieiro

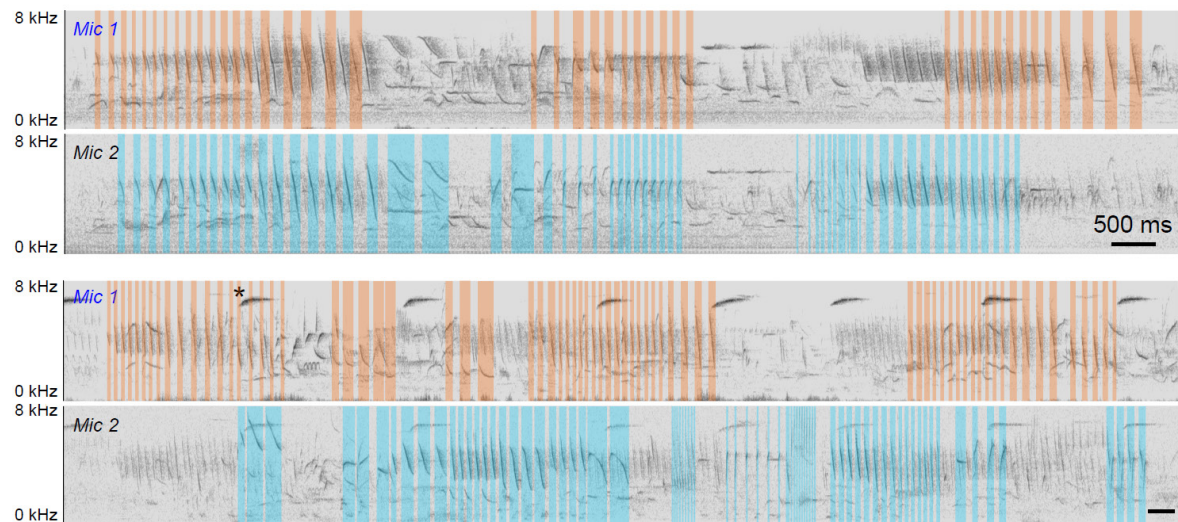

C São João

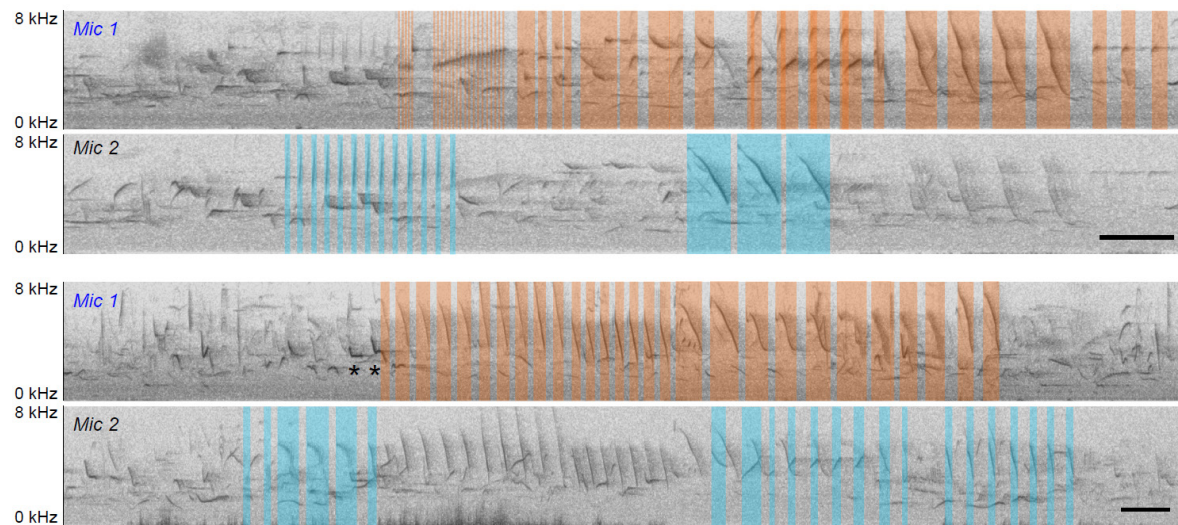

456

457 **Fig. 1. Multiple microphone recordings reveal overlapping songs from wild canaries. A.**  
 458 Recording sites are indicated on a map of Pico island. **B.** Spectrograms of two example overlapping  
 459 singing periods in Arieiro and **C.** two example overlapping singing periods in São João. Syllables  
 460 from putative canary songs from two different canaries recorded preferentially in microphone 1  
 461 (Mic1) or microphone 2 (Mic 2) are labelled in red and blue respectively. Scale bars, 500 ms. Note  
 462 that recordings also show additional distant canary songs (top), and the vocal production of  
 463 additional species (some examples being annotated with stars).

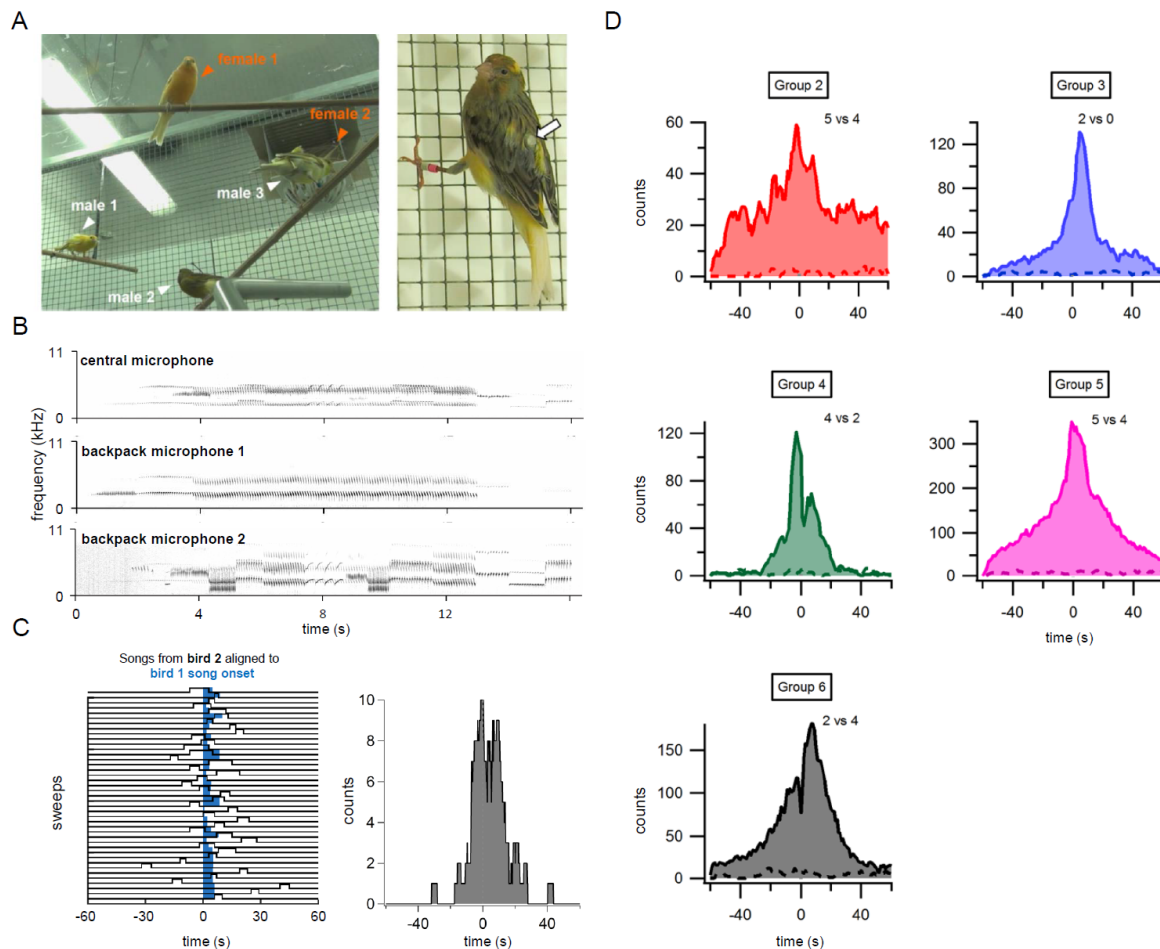

**Fig. 2. Telemetric recordings with backpack microphones reveal temporally-overlapping songs.** **A.** Left, experimental design: mixed groups comprising two female and three male canaries, all individually equipped with a backpack microphone. Right, male canary equipped with an individual microphone, pointed by the arrow. **B.** Representative simultaneous recording from a central microphone and from two backpack microphones confirms the identification of the individual vocal production by backpacked microphones. **C.** Left, example raster plot for all songs sung in a day by a canary (blue) and aligned vocal activity of a second canary (black). Right, corresponding histogram of the times at which songs were recorded in canary 2 centered at song onset from the reference canary 1. Bin size: 1 s. **D.** Data for all days in each group show increased singing when the singing activity of one bird was aligned to a second bird. Histograms were also generated from shuffled data (dashed lines), confirming that distributions correspond to increased firing of canaries in the 60 s time-window relative to random overlaps. Bin size: 1 s.

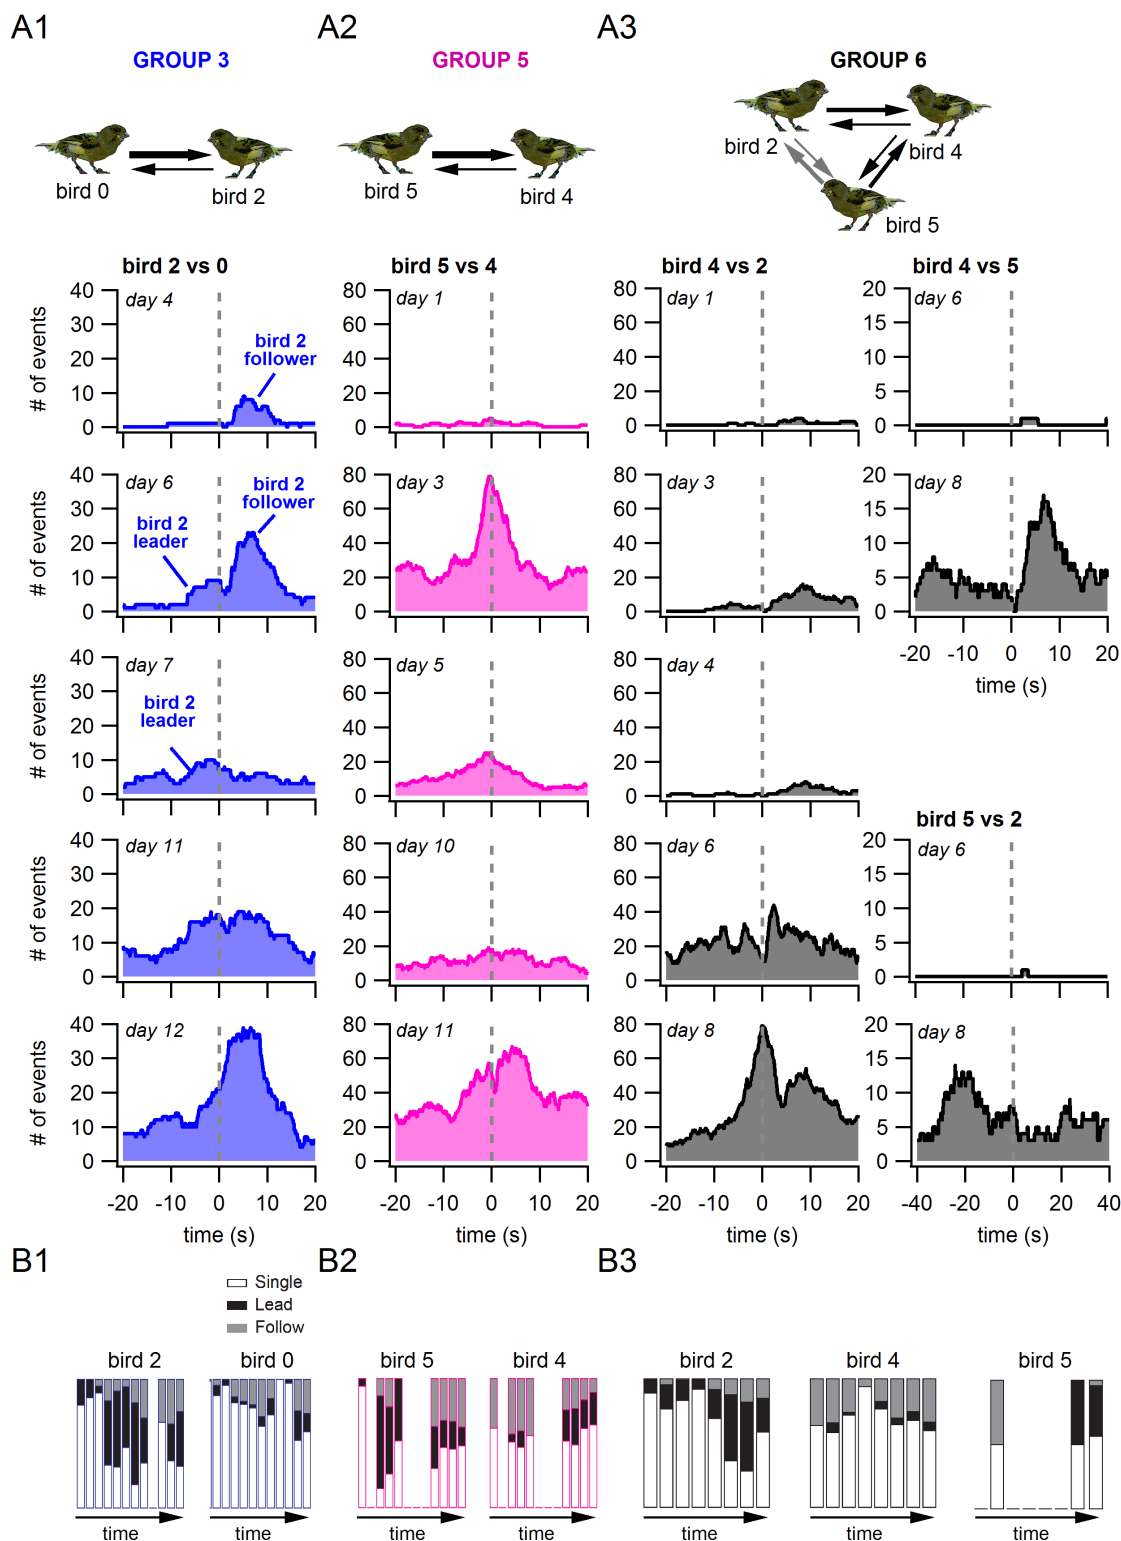

**Fig. 3. Singing dynamics reveal temporally-evolving follower and leader roles. A1, A2, A3.** Examples of singing interactions in three groups and their time course across several days. Note the change of scale in the bottom right histogram of the times at which songs were recorded centered at song onset from the reference bird. Bin size: 100 ms. **B1, B2, B3** illustrate the fraction of solo, overlapping and overlapped songs in each group. Note that empty entries shown in figure 3B

485 correspond to the absence of singing activity detected during the whole day.

486

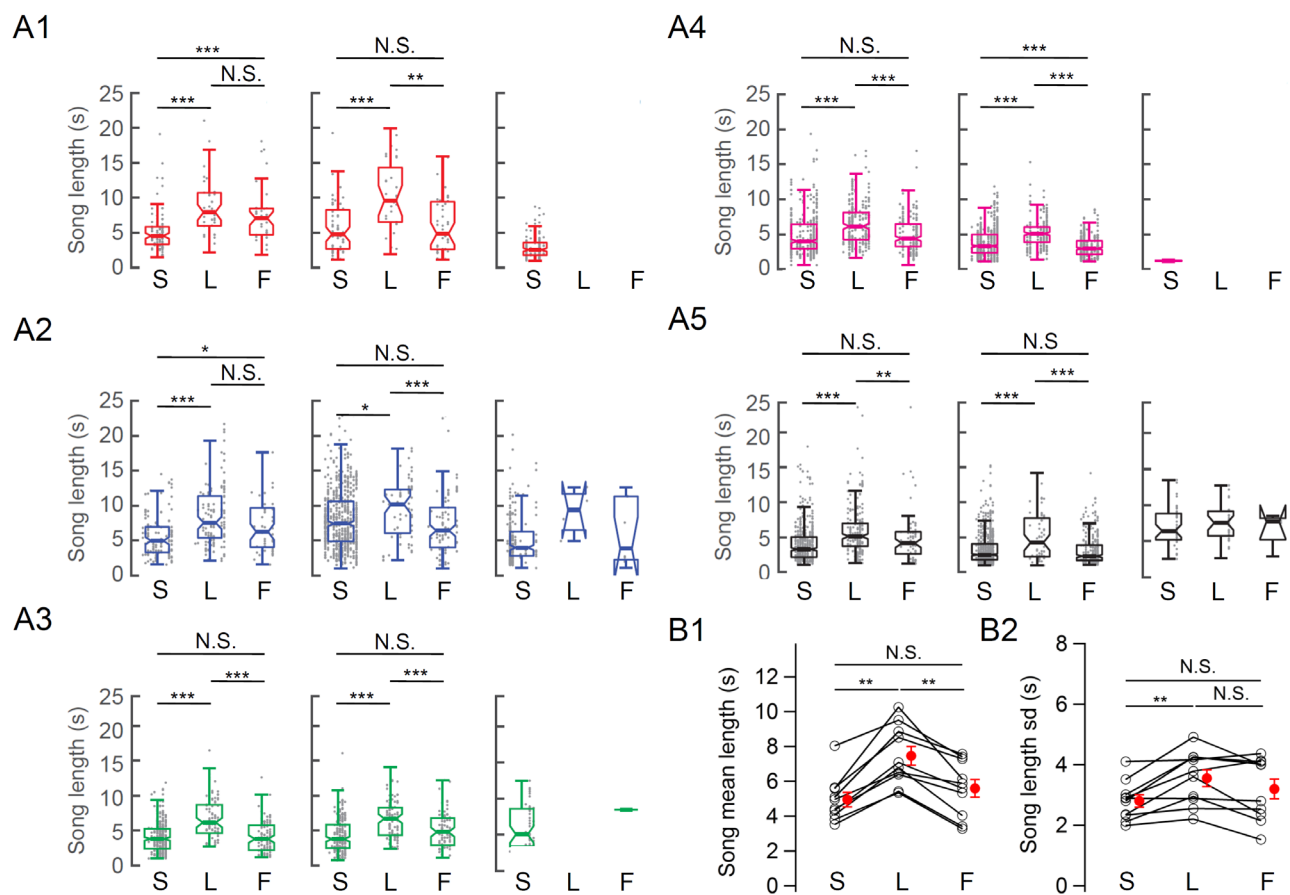

**Fig. 4. Song length and its variability depend on the relative timing of singing onset from male canaries.**

**A1-A5.** Song length for the three canaries in each of the five groups were plotted in panels A1 to A5. S, solo songs; L, leading songs; F, following songs. Multi-comparison Dunn-Holland-Wolfe test, \*  $P < 0.05$ , \*\*  $P < 0.01$ , \*\*\*  $P < 0.001$ . **B1.** Summary data show significant differences in average song length for solo, leader and follower songs. Each line links average song lengths from the same bird in different singing conditions (S, solo songs; L, leading songs; F, following songs). \*  $P < 0.05$ , \*\*  $P < 0.01$ , two-tail Wilcoxon Signed-Rank test. **B2.** Summary data for all four groups show significant differences in the standard deviation of song length for solo, leader and follower songs.  $P < 0.05$ , \*\*  $P < 0.01$ , two-tail Wilcoxon Signed-Rank test.



498

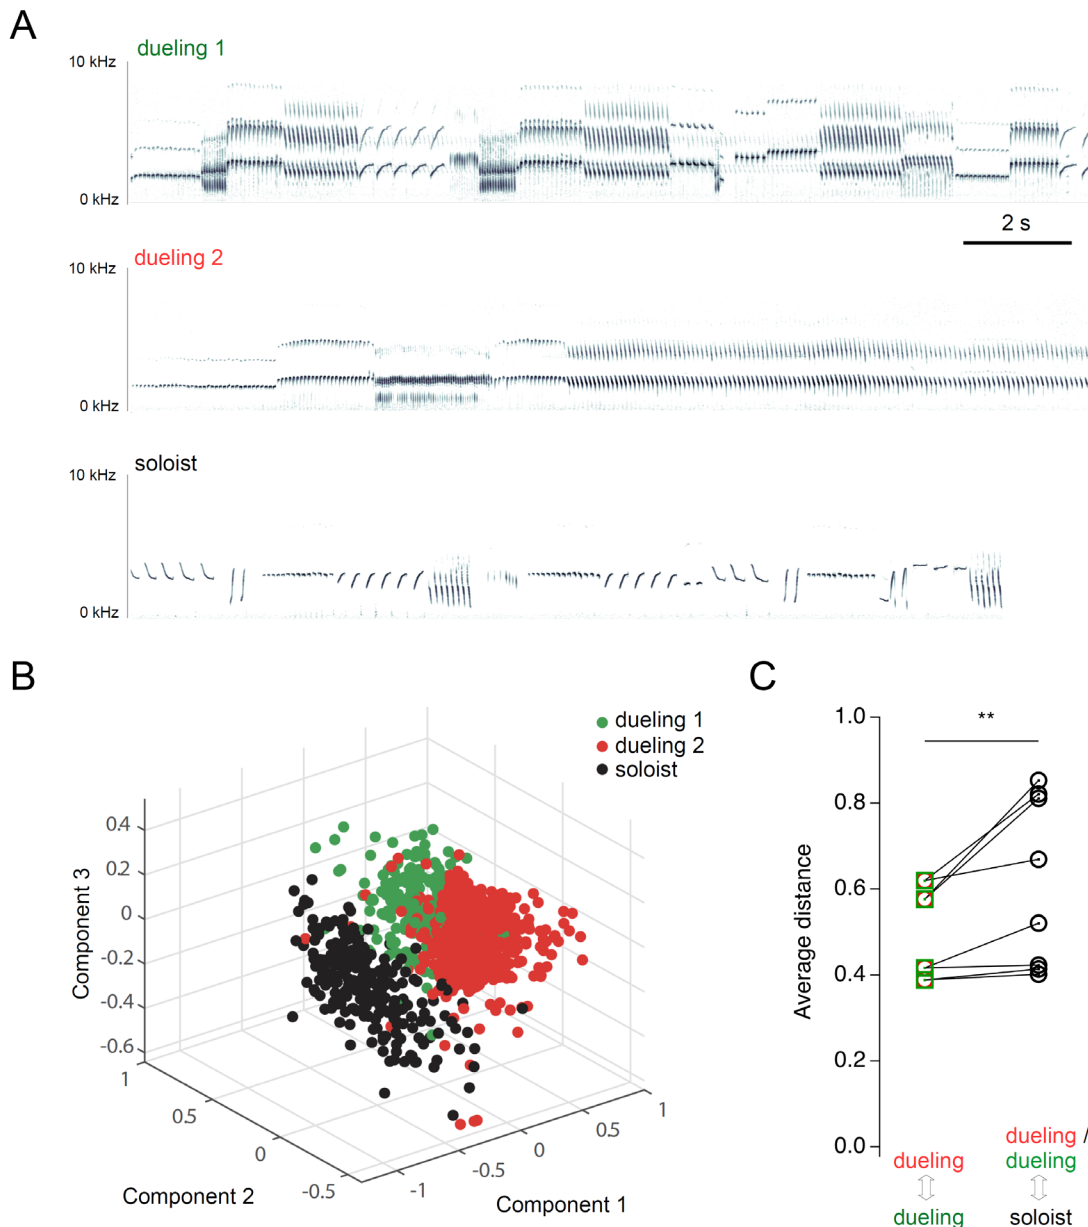

499

500 **Fig. 5. Dueling singers sing similar songs.** **A.** Representative example of songs from the three  
501 canaries in a group. **B.** PCA reveals closer songs in the three first components describing song  
502 parameters between dueling birds than between a dueling bird and the soloist. Data represents all  
503 individual songs (dots) of the three males in a group. **C.** Summary results for all four groups  
504 comparing the distance in the 3-component vector space between songs of the two dueling birds  
505 with each other and songs of each dueling bird with the soloist bird of the group. \*\*  $P < 0.01$ , two-  
506 tail Wilcoxon Signed-Rank test.
